# Supplementary material for: Perovskite and quantum dot tandem solar cells with interlayer modification for improved optical semitransparency and stability
Source: Royal Society of Chemistry journal article supplement (doi:10.1039/d0nr08375e), 2021-01-01
Supplement: d0nr08375e1.pdf [file d0nr08375e1.pdf]

**Supporting Information**

**Perovskite and Quantum Dot Tandem Solar Cells  
with Interlayer Modification for Improved Optical  
Semitransparency and Stability**

*Aneta Andruszkiewicz<sup>1</sup>, Xiaoliang Zhang<sup>2</sup>, Malin B. Johansson<sup>1</sup>, Lin Yuan<sup>1</sup>, Erik M. J.*

*Johansson<sup>1\*</sup>*

<sup>1</sup>Department of Chemistry-Ångström, Physical Chemistry, Uppsala University, 75120, Uppsala,  
Sweden

<sup>2</sup>School of Materials Science and Engineering, Beihang University, Beijing 100191, China

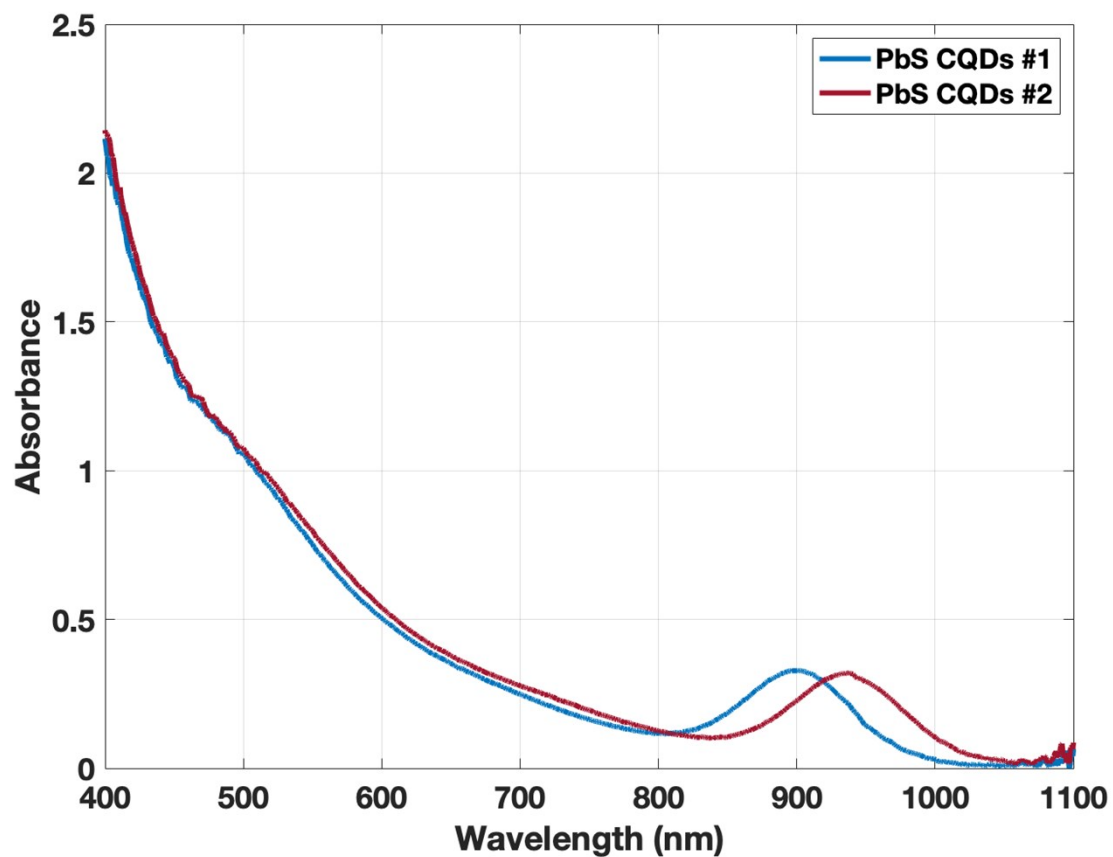

**Figure S1.** UV-Vis-NIR absorbance spectrum of PbS CQDs #1 and #2 solutions, where  $\lambda_{max}$  was 901 and 935 nm respectively.

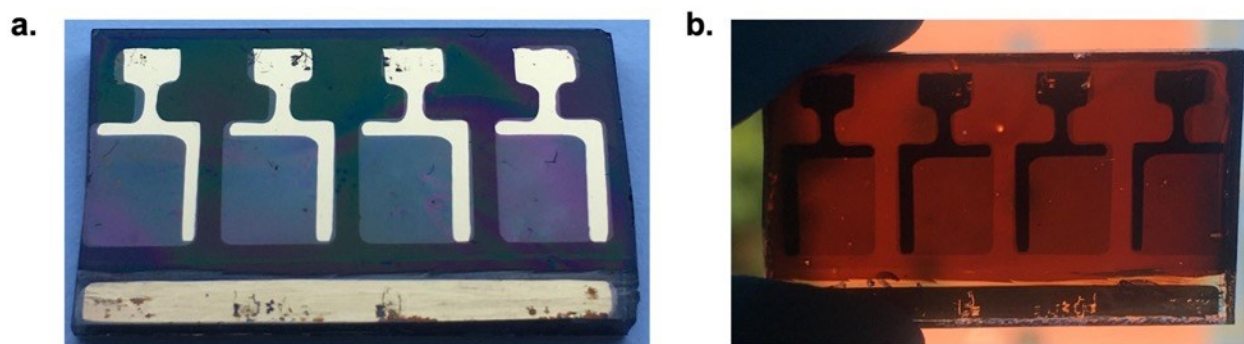

**Figure S2.** Picture of the MAPbI<sub>3</sub> semi-transparent solar cell with patterned design of Au electrode: (a) top view and (b) cross view. The size of presented solar cells is 2.4x1.4 cm.

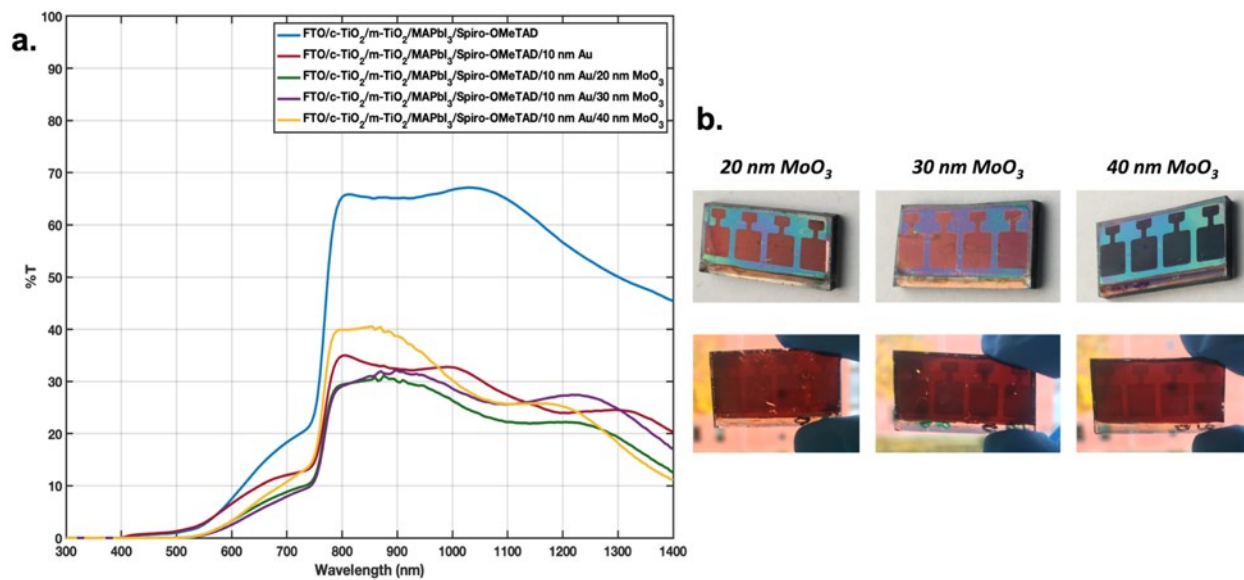

**Figure S3.** (a) Transmittance spectrum of the perovskite solar cell with the following structure: FTO glass/compact TiO<sub>2</sub>/mesoporous TiO<sub>2</sub>/MAPbI<sub>3</sub> perovskite/Spiro-OMeTAD/10 nm Au with different thicknesses of MoO<sub>3</sub> layer on top. (b) Pictures of the semi-transparent MAPbI<sub>3</sub> solar cells with 10 nm Au electrode and different thicknesses of MoO<sub>3</sub> on top of it: top and through views. The size of presented solar cells is 2.4x1.4 cm.

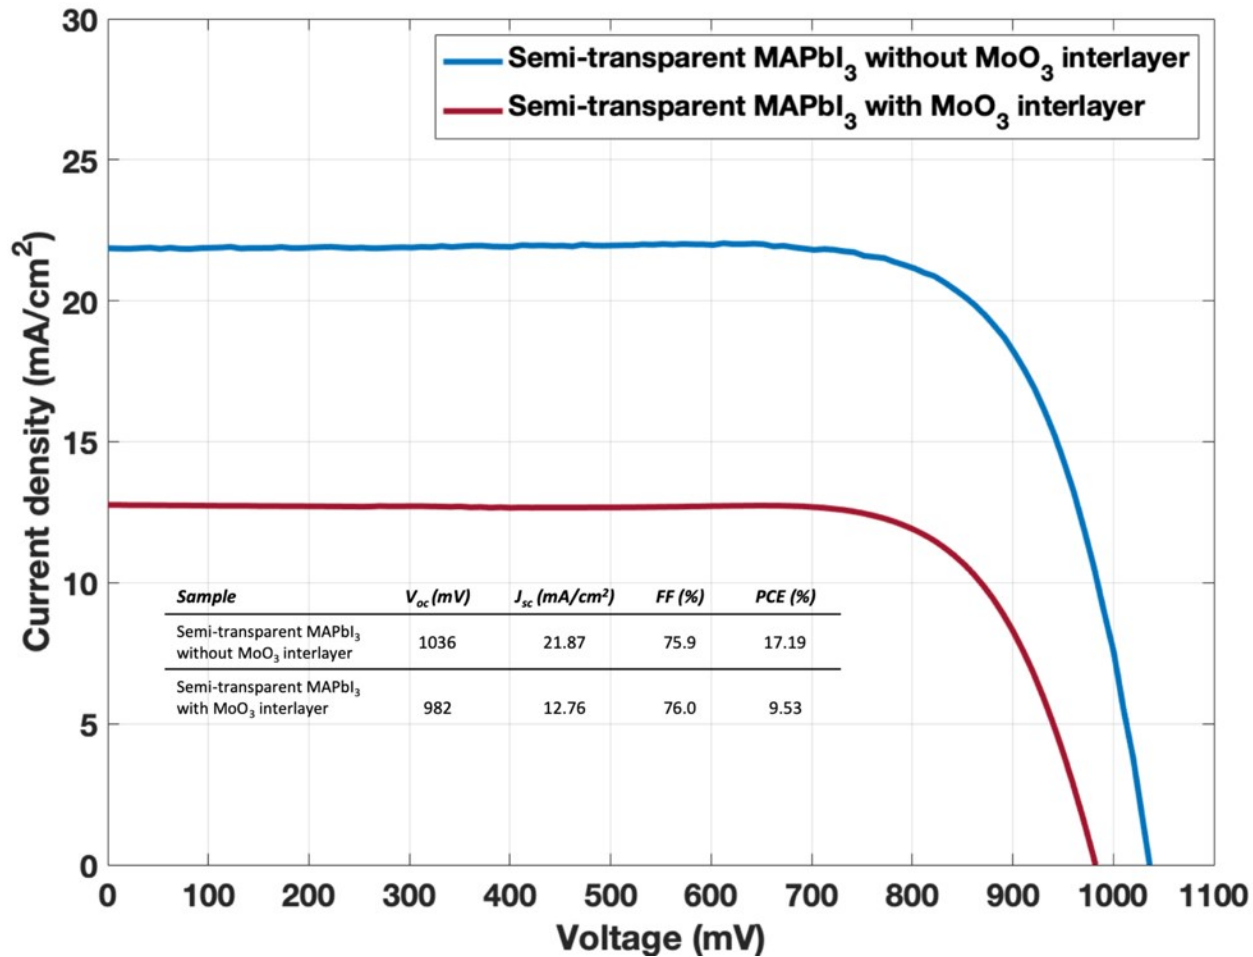

**Figure S4.** Current-voltage measurements of the semi-transparent MAPbI<sub>3</sub> solar cell with 10 nm Au electrode (blue line) and with 10 nm Au electrode followed by 20 nm MoO<sub>3</sub> interlayer (red line).

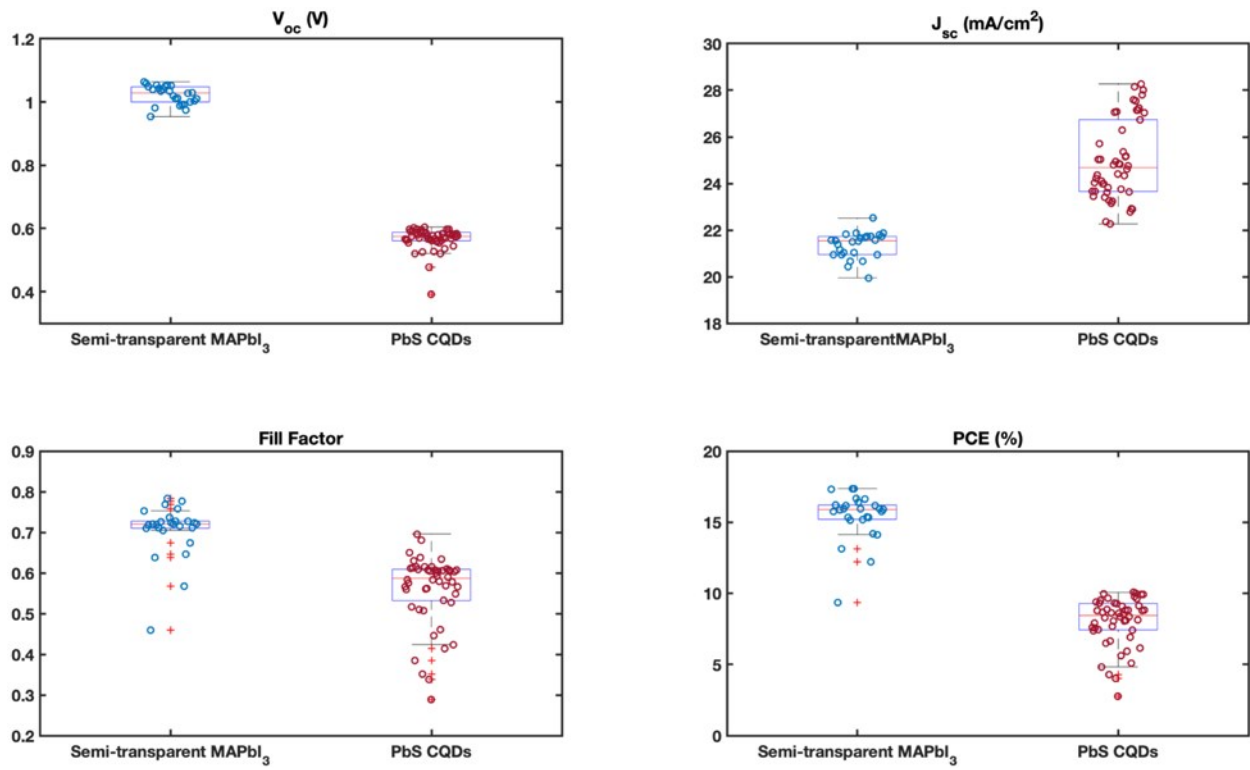

**Figure S5.** Current-voltage ( $JV$ ) measurements statistics for semi-transparent MAPbI<sub>3</sub> solar cells with 10 nm Au electrode (blue) and PbS colloidal quantum dots solar cells of both  $\lambda_{max}=901$  nm and  $\lambda_{max}=935$  nm (red). For the semi-transparent MAPbI<sub>3</sub> statistics 26 samples were used and for PbS CQD solar cell 50 samples.

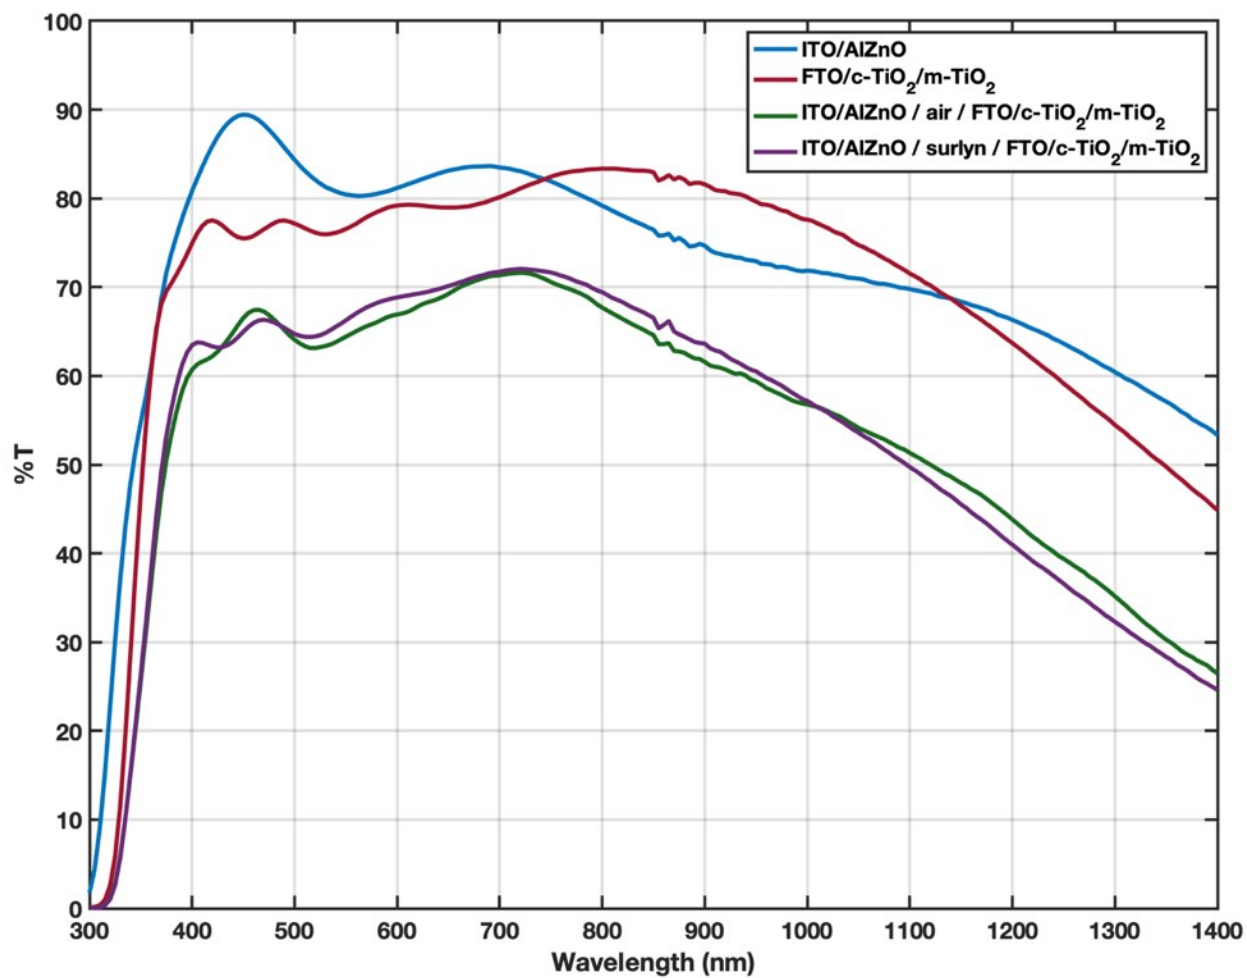

**Figure S6.** Transmittance measurements of the following samples: (blue) ITO/aluminum zinc oxide (AlZnO), (red) FTO/compact TiO<sub>2</sub> (c-TiO<sub>2</sub>) /mesoporous TiO<sub>2</sub> (m-TiO<sub>2</sub>), (green) ITO/AlZnO/ air 'layer' /FTO/ c-TiO<sub>2</sub>/ m-TiO<sub>2</sub> and (purple) ITO/AlZnO/ surlyn interlayer /FTO/ c-TiO<sub>2</sub>/ m-TiO<sub>2</sub>

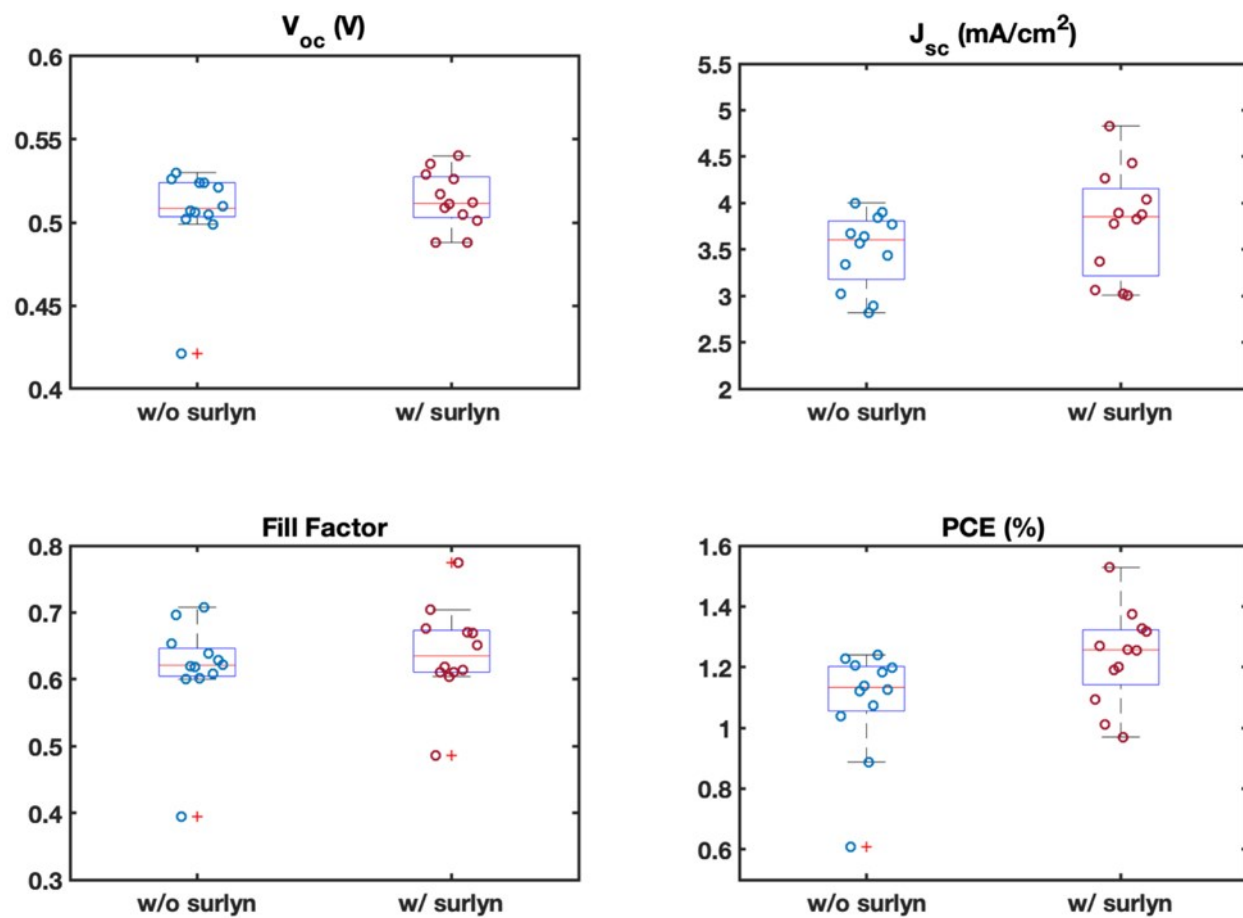

**Figure S7.** Current-voltage ( $JV$ ) measurements statistics for filtered PbS CQDs solar cells with surlyn interlayer (red) or without it (blue). 12 samples of PbS CQDs with both  $\lambda_{max}$  equal 901 and 935 nm respectively were used for these statistics measurements.

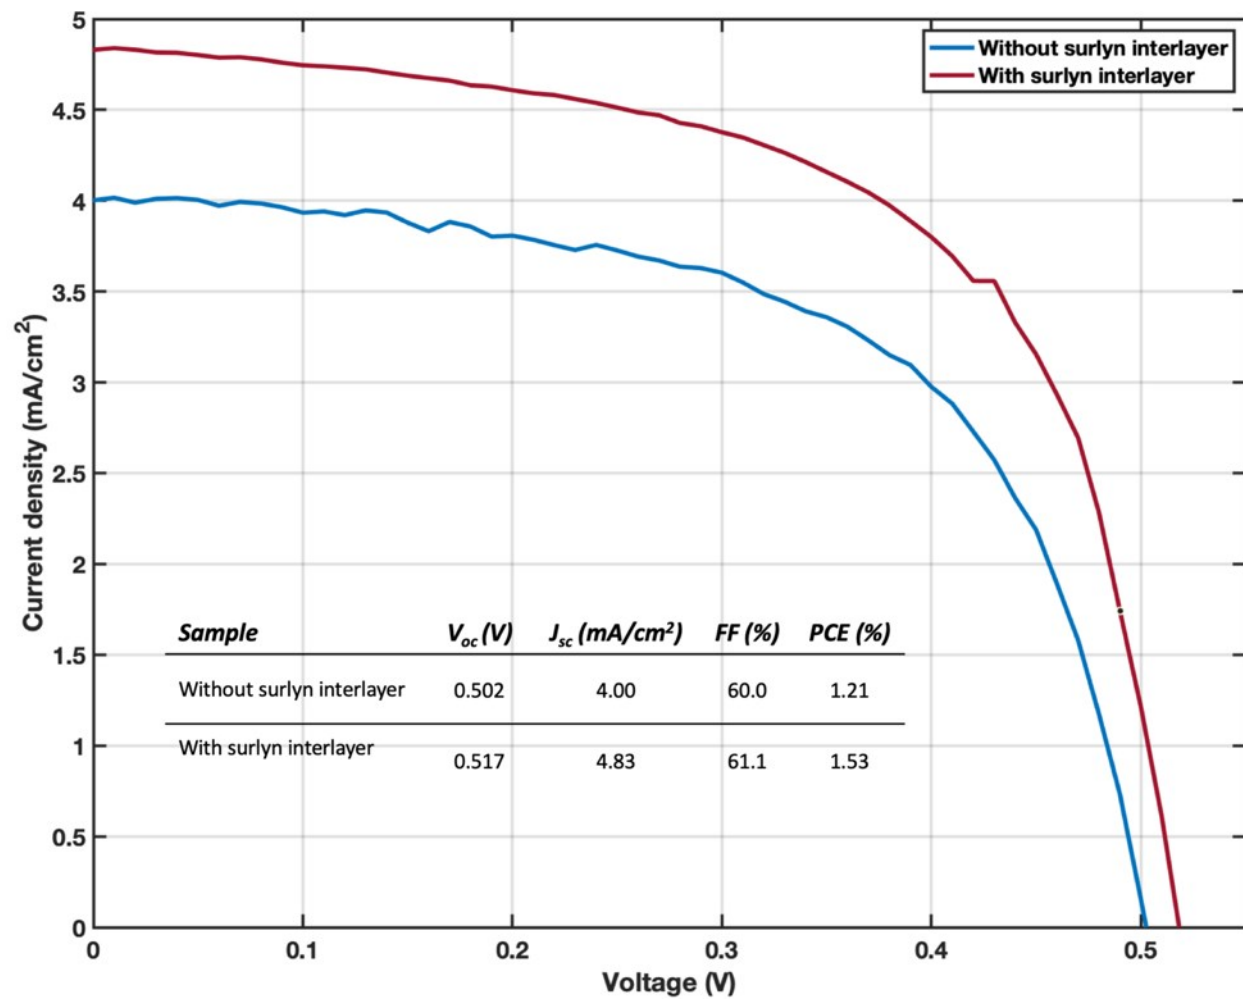

**Figure S 8.** Current-voltage measurements of the champion filtered PbS CQDs solar cells with surlyn interlayer (red) or without it (blue).



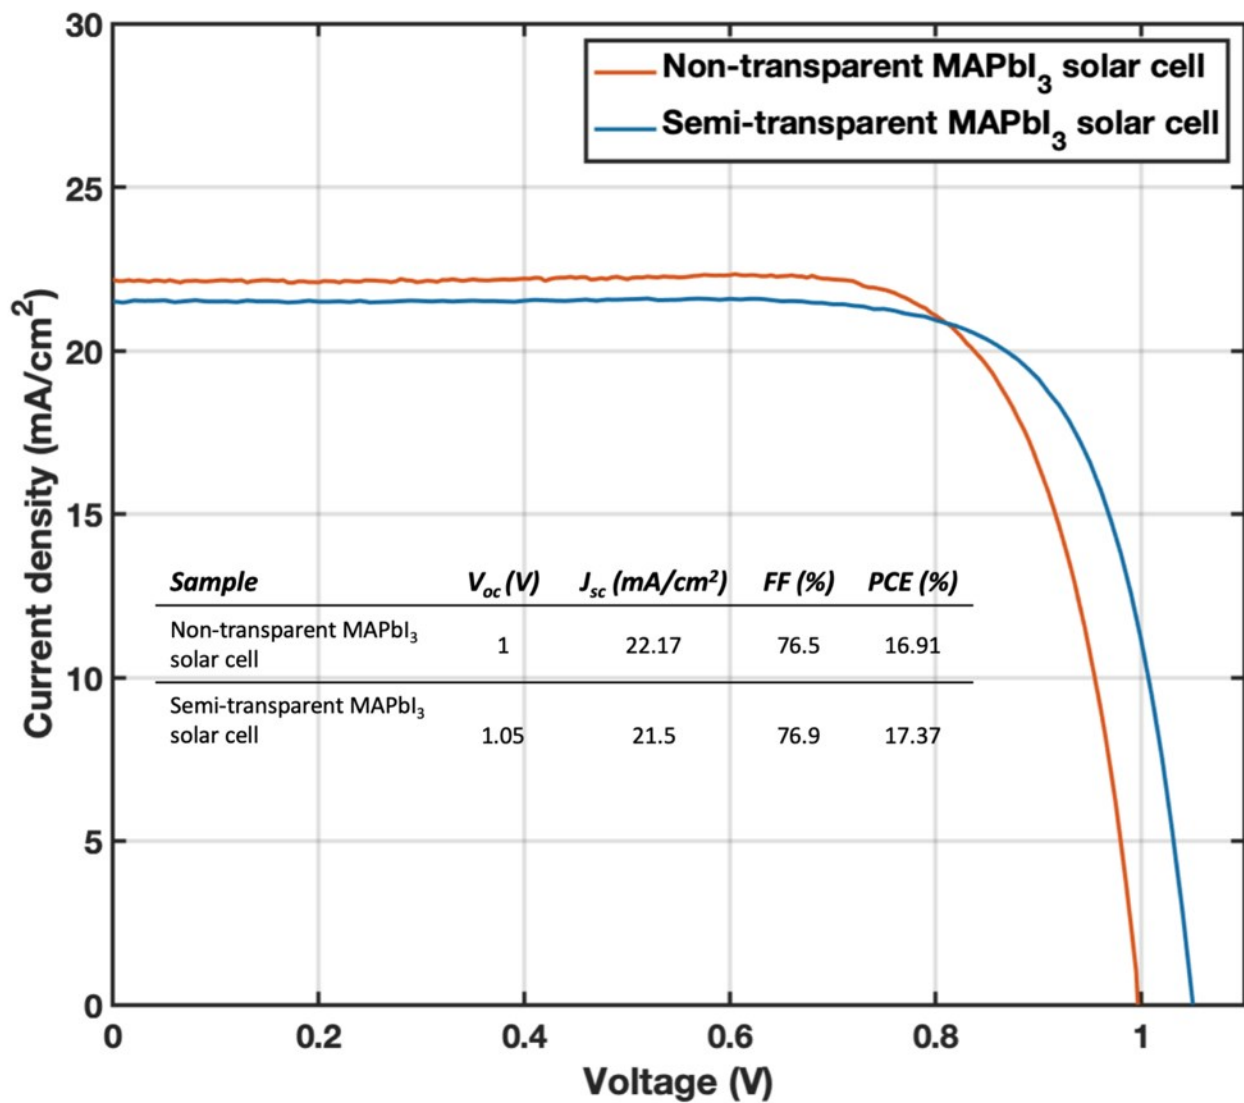

**Figure S9.** Current-voltage measurement of the non-transparent MAPbI<sub>3</sub> solar cell with 80 nm Au electrode (orange line) and semi-transparent MAPbI<sub>3</sub> solar cell with 10 nm Au (blue line).
